# Supplementary material for: Effectiveness of seed dispersal by foxes in areas with different human disturbances in southern Chile
Source: PeerJ. 2025 Oct 21;13:e20150. doi: 10.7717/peerj.20150 (PMC12551663; doi:10.7717/peerj.20150)
Supplement: Supplemental Information 1 — The raw data include seeds extracted from fox feces collected across different landscapes, with information on seed identification and quantity per plant species, classified as native or exotic. The dataset also contains variables derived from satellite imagery describing the landscape (number of forest patches, distance to dwellings, land cover types, infrastructure, among others) and the classification of landscapes as less or more disturbed. Additionally, experimental data on seed viability and germination are included, which were used to calculate the Seed Dispersal Effectiveness (SDE) index for each plant species and landscape type. These data were used for the statistical analyses presented in this study. [file peerj-13-20150-s001.xlsx]

## Sheet: Datos generales
ID	Landscape	Animal species	Number of forest patches	Distance to nearest house (m)	Number of dwellings (N° of dwellings / ha)	Native forest (ha)	Wetland (ha)	Grassland (ha)	Scrubland (ha)	Rocky outcrop (ha)	Exotic tree plantation (ha)	Agricultural and grazing mosaic (ha)	Infrastructure (N° of Infrastructure / ha)	Beach sand and dune (ha)	Plants species	Quantity of seeded feces	Quantity of seeds	Total seed viability test	Coloured seeds	% Viability	Seeds planted	Germinated seeds	% Germination
79	Undisturbed	Lycalopex griseus	4	984.208	3	94.5989	1.17717	0.128598	0	0	0.296765	2.18617	0	1.61242	Aristotelia chilensis	1	15	5	5	100	5	5	100
80	Undisturbed	Lycalopex griseus	6	1190.58	3	95.1128	1.1575	0.128611	0	0	0.296795	1.77087	0	1.53344	No identificada	1
81	Undisturbed	Lycalopex griseus	3	1494.57	1	96.1417	0.929956	0.148397	0	0.267115	0.336367	0.593589	0	1.58291	Aristotelia chilensis	1	9	4	4	100	4	4	100
82	Undisturbed	Lycalopex griseus	5	1126.35	3	94.9273	1.1767	0.128547	0	0	0.296648	1.92821	0	1.54257	Aristotelia chilensis	1	6	2	2	100	2	2	100
83	Undisturbed	Lycalopex griseus	5	1128.34	3	94.9273	1.1767	0.128547	0	0	0.296648	1.92821	0	1.54257	Aristotelia chilensis	1	5	2	2	100	2	2	100
84	Undisturbed	Lycalopex griseus	4	859.062	6	94.2334	1.20673	0.128586	0	0	0.217606	2.59149	0	1.62216	Aristotelia chilensis	1	3	1	1	100	1	1	100
85	Undisturbed	Lycalopex griseus	6	731.598	7	93.9274	1.26595	0.128573	0	0	0.217585	2.88794	0	1.57255	Aristotelia chilensis	1	10	2	2	100	2	2	100
87	Disturbed	Lycalopex griseus	20	449.087	18	34.7151	1.02889	0	0	0	0	64.256	0	0	Aristotelia chilensis	1	60	4	4	100	10	10	100
87	Disturbed	Lycalopex griseus	20	449.087	18	34.7151	1.02889	0	0	0	0	64.256	0	0	Prunus spp.	1	10	2	1	50	6	1	16.6667
88	Undisturbed	Lycalopex griseus	1	659.872	2	98.8822	0	0	0	0	0	0.484717	0	0	No identificada	1
89	Undisturbed	Lycalopex griseus	1	686.064	2	98.4466	0	0	0	0	0	0.484813	0	0	No identificada	1
90	Undisturbed	Lycalopex sp	1	686.064	2	98.4466	0	0	0	0	0	0.484813	0	0	No identificada	1
91	Undisturbed	Lycalopex griseus	1	684.616	2	98.0807	0	0	0	0	0	0.484765	0	0	No identificada	1
92	Undisturbed	Lycalopex griseus	1	1646.71	0	83.907	0	0	0	0	0	0	0	0	No identificada	1
93	Undisturbed	Lycalopex griseus	4	748.106	8	94.0548	1.29587	0.128598	0	0	0.009892	2.95776	0	1.55307	Aristotelia chilensis	1	13	5	5	100	5	5	100
94	Undisturbed	Lycalopex griseus	4	815.407	7	94.0356	1.2364	0.128586	0	0	0.217606	2.77943	0	1.60237	Aristotelia chilensis	1	11	4	4	100	4	4	100
95	Undisturbed	Lycalopex griseus	4	989.306	3	94.5973	1.17752	0.128636	0	0	0.296853	2.18682	0	1.6129	Aristotelia chilensis	1	25	5	5	100	5	5	100
96	Undisturbed	Lycalopex griseus	5	1046.01	3	94.6791	1.17694	0.128573	0	0	0.286816	2.1264	0	1.60221	Aristotelia chilensis	1	24	8	8	100	5	5	100
97	Undisturbed	Lycalopex griseus	5	1348.51	2	95.7373	1.05825	0.148353	0	0.118683	0.306597	1.18683	0	1.44397	Aristotelia chilensis	1	16	4	4	100	8	8	100
98	Undisturbed	Lycalopex griseus	5	1341.17	3	95.7274	1.06814	0.148353	0	0.098902	0.306597	1.22639	0	1.42419	Aristotelia chilensis	1	10	5	5	100	4	4	100
101	Undisturbed	Lycalopex griseus	5	1023.67	3	94.6422	1.17635	0.128509	0	0	0.276789	2.17477	0	1.60142	Aristotelia chilensis	1	18	5	5	100	5	5	100
118	Disturbed	Lycalopex griseus	36	80.6933	34	11.7321	3.90741	0.801266	0	0	9.85261	73.7066	0	0	Prunus spp.	1	2	1	1	100	1	0	0
118	Disturbed	Lycalopex griseus	36	80.6933	34	11.7321	3.90741	0.801266	0	0	9.85261	73.7066	0	0	Malus sylvestris	1	2	1	1	100	2	0	0
119	Disturbed	Lycalopex sp	12	83.381	116	86.9784	1.36445	3.40123	0	0	0	3.32213	1.69073	0.138422	Aristotelia chilensis	1	39	10	6	60	25	0	0
120		Canis lupus familiaris	20	467.631	10	15.8244	1.15716	0	0	0	0.415389	80.9613	1.64178	0	Prunus spp.	1	3	1	1	100	2	2	100
127	Undisturbed	Lycalopex griseus	1	1618.29	0	100	0	0	0	0	0	0	0	0	Aristotelia chilensis	1	3	1	0	0	1	1	100
144	Undisturbed	Lycalopex griseus	1	3734.47	0	94.9253	0.148383	0.0197844	0	1.31566	0	0	0	3.59086	Ugni molinae	1	739	18	14	77.7778	30	0	0
147	Undisturbed	Lycalopex griseus	1	2557.68	0	97.2008	0.0197824	0.128586	0	0.979228	0	0	0	1.67161	Ugni molinae	1	215	14	13	92.8571	30	0	0
149	Undisturbed	Lycalopex sp	10	395.035	57	49.1789	5.95568	0	0	0	0.573803	0.593589	3.30431	0.326474	Gaultheria mucronata	1	280	19	5	26.3158	35	0	0
150	Undisturbed	Lycalopex griseus	19	1654.83	0	71.5148	0	3.0276	0	24.6958	0	0	0	0.761848	Prunus spp.	1	9	3	2	66.6667	6	5	83.3333
151	Undisturbed	Lycalopex griseus	8	279.75	2	81.1375	0	0.286845	0	3.04649	0	0	0	0	Ugni molinae	1	715	12	12	100	30	0	0
152	Undisturbed	Lycalopex griseus	7	286.941	2	80.8092	0	0.296765	0	3.05668	0	0	0	0	Ugni molinae	1	300	18	16	88.8889	30	0	0
153	Undisturbed	Lycalopex griseus	8	451.777	2	75.5342	0	0.425406	0	3.67036	0	0	0	0	Ugni molinae	1	192	10	8	80	30	0	0
155	Disturbed	Lycalopex griseus	36	236.775	11	76.0483	5.93354	0.148339	1.26582	5.58742	0.979035	5.73576	0	4.30182	Rubus ulmifolius	1	24	3	3	100	17	3	17.6471
156	Undisturbed	Lycalopex culpaeus	1	1480.24	1	98.4667	0	0.880404	0.118706	0.534177	0	0	0	0	Rubus ulmifolius	1	502	21	14	66.6667	30	0	0
157	Undisturbed	Lycalopex culpaeus	1	721.698	1	99.436	0	0	0	0	0	0	0	0	Rubus ulmifolius	1	NA	NA	NA	NA
158	Undisturbed	Lycalopex griseus	3	341.01	15	97.1816	0.0296677	0.237342	0	0	0	2.52176	0	0	Rubus ulmifolius	1	246	15	11	73.3333	30	0	0
160	Undisturbed	Lycalopex griseus	4	320.549	15	97.133	0.0593178	0.237271	0	0	0	2.51112	0	0	Rubus ulmifolius	1	56	11	6	54.5455	30	0	0
161	Undisturbed	Lycalopex culpaeus	1	52.0439	4	96.5961	0	0	0	0	0	0.999406	1.66238	0.742133	Rubus ulmifolius	1	469	18	12	66.6667	30	0	0
162	Undisturbed	Lycalopex griseus	7	246.177	105	86.7148	0.197844	0	0	0	0	13.0874	0	0	Gaultheria mucronata	1	15	9	8	88.8889	6	0	0
162	Undisturbed	Lycalopex griseus	7	246.177	105	86.7148	0.197844	0	0	0	0	13.0874	0	0	Rubus ulmifolius	1	327	18	15	83.3333	30	8	26.6667
162	Undisturbed	Lycalopex griseus	7	246.177	105	86.7148	0.197844	0	0	0	0	13.0874	0	0	Ugni molinae	1	83	10	9	90	30	0	0
163	Undisturbed	Lycalopex griseus	6	384.052	111	88.7196	0.158322	0	0	0	0	11.1221	0	0	Gaultheria mucronata	1	51	4	0	0	0	0	0
163	Undisturbed	Lycalopex griseus	6	384.052	111	88.7196	0.158322	0	0	0	0	11.1221	0	0	Rubus ulmifolius	1	494	16	8	50	30	0	0
164	Undisturbed	Lycalopex griseus	6	381.302	112	88.7735	0.158259	0	0	0	0	11.0683	0	0	Prunus spp.	1	1	1	1	100	1	1	100
165	Undisturbed	Lycalopex griseus	2	1095.33	1	87.2972	0	0	0	0	0	0.286901	0	0	Prunus spp.	1	1	1	1	100	1	0	0
165	Undisturbed	Lycalopex griseus	2	1095.33	1	87.2972	0	0	0	0	0	0.286901	0	0	Ugni molinae	1	663	15	12	80	30	30	100
166	Undisturbed	Lycalopex griseus	2	963.702	1	91.9379	0	0	0	0	0	0.286873	0	0	Ugni molinae	1	48	14	14	100	25	25	100
167	Undisturbed	Lycalopex griseus	1	660.97	2	99.4955	0	0	0	0	0	0.484717	0	0	Gaultheria mucronata	1	302	17	6	35.2941	30	0	0
167	Undisturbed	Lycalopex griseus	1	660.97	2	99.4955	0	0	0	0	0	0.484717	0	0	Prunus spp.	1	2	1	1	100	2	0	0
168	Undisturbed	Lycalopex griseus	6	1249.22	3	95.379	1.13794	0.128636	0	0.009895	0.296853	1.56343	0	1.48427	Prunus spp.	1	1	1	1	100	1	0	0
168	Undisturbed	Lycalopex griseus	6	1249.22	3	95.379	1.13794	0.128636	0	0.009895	0.296853	1.56343	0	1.48427	Rubus ulmifolius	1	18	5	4	80	11	0	0
168	Undisturbed	Lycalopex griseus	6	1249.22	3	95.379	1.13794	0.128636	0	0.009895	0.296853	1.56343	0	1.48427	Ugni molinae	1	153	15	14	93.3333	30	0	0
169	Undisturbed	Lycalopex griseus	4	1484.3	1	96.112	0.93985	0.148397	0	0.267115	0.316581	0.623269	0	1.5928	Prunus spp.	1	1	1	1	100	1	0	0
169	Undisturbed	Lycalopex griseus	4	1484.3	1	96.112	0.93985	0.148397	0	0.267115	0.316581	0.623269	0	1.5928	Ugni molinae	1	181	16	16	100	30	0	0
170	Undisturbed	Lycalopex griseus	1	2546.64	0	97.2096	0.00989511	0.128636	0	0.979616	0	0	0	1.67227	Gaultheria mucronata	1	120	19	19	100	30	30	100
170	Undisturbed	Lycalopex griseus	1	2546.64	0	97.2096	0.00989511	0.128636	0	0.979616	0	0	0	1.67227	Ugni molinae	1	250	21	18	85.7143	30	30	100
171	Undisturbed	Lycalopex sp	1	3909.87	0	94.7358	0.148427	0.0197902	0	1.31605	0	0	0	3.77993	Gaultheria mucronata	1	699	19	19	100	30	0	0
171	Undisturbed	Lycalopex sp	1	3909.87	0	94.7358	0.148427	0.0197902	0	1.31605	0	0	0	3.77993	Ugni molinae	1	20	5	5	100	15	0	0
172		Felis catus	4	854.98	6	94.223	1.20685	0.128598	0	0	0.217628	2.60164	0	1.62232	Prunus spp.	1
173		NN	17	15.5986	258	75.4426	0.326377	0	0.148353	0	0	24.0827	0	0	Prunus spp.	1
177	Disturbed	Lycalopex griseus	30	58.6683	23	69.6964	7.35832	0.138463	1.52309	3.20443	1.622	9.71219	0	6.74513	Prunus spp.	1	1	1	1	100	1	0	0
178	Disturbed	Lycalopex griseus	29	72.2469	23	69.4263	7.42829	0.138477	1.52324	3.22453	1.62216	9.98022	0	6.65677	Prunus spp.	1	4	1	1	100	3	3	100
179	Disturbed	Lycalopex griseus	37	100.863	24	69.2194	7.85594	0.108835	1.32581	2.78025	2.05798	10.2899	0	6.36193	Rubus ulmifolius	1	584	21	16	76.1905	30	6	20
180	Disturbed	Lycalopex sp	25	128.657	29	69.44	7.45944	0	0.643055	0.771666	3.3241	14.4143	0	3.94737	Rubus ulmifolius	1	657	20	15	75	30	0	0
181	Disturbed	Lycalopex griseus	34	136.465	25	69.176	7.91374	0.0395687	1.25631	2.67089	2.21585	10.4263	0	6.30132	Rubus ulmifolius	1	845	20	17	85	30	2	6.66667
182	Undisturbed	Lycalopex sp	22	1045.94	36	54.1143	0.544608	0.178235	0	21.0021	0	2.07941	0.722844	13.6251	Ugni molinae	1	363	23	14	60.8696	30	0	0
183	Undisturbed	Lycalopex griseus	21	1471.21	1	54.5769	0.0296883	0	0	27.8872	0	3.15685	0	13.4191	Ugni molinae	1	87	23	21	91.3043	30	0	0
184	Undisturbed	Lycalopex griseus	28	1596.59	0	52.6711	0	0	0	29.7685	0	4.02651	0	13.4349	Ugni molinae	1	222	21	16	76.1905	30	30	100
185	Undisturbed	Lycalopex griseus	26	1695.19	0	51.9644	0	0	0	29.9159	0	4.71054	0	13.2805	Ugni molinae	1	206	21	21	100	30	30	100
186	Undisturbed	Lycalopex griseus	21	1713.4	0	51.5035	0.0098912	0	0	29.2384	0	5.65777	0	13.3432	Ugni molinae	1	335	15	15	100	20	30	150
188	Undisturbed	Lycalopex griseus	5	55.6175	2	88.2097	0	0.405539	0	2.7003	0	0	0	0	Ugni molinae	1	835	22	22	100	30	0	0
190	Undisturbed	Lycalopex griseus	6	165.252	2	85.2691	0	0.217649	0	2.79976	0	0	0	0	Rubus ulmifolius	1	2	21	12	57.1429	2	2	100
190	Undisturbed	Lycalopex griseus	6	165.252	2	85.2691	0	0.217649	0	2.79976	0	0	0	0	Ugni molinae	1	51	21	12	57.1429	30	0	0
191	Undisturbed	Lycalopex sp	5	207.749	2	84.3033	0	0.197941	0	2.90974	0	0	0	0	Ugni molinae	1	428	21	20	95.2381	30	0	0
192		Neovison vison	5	262.914	2	83.2608	0	0.286901	0	3.13613	0	0	0	0	Ugni molinae	1
194	Undisturbed	Lycalopex griseus	7	266.115	2	82.3541	0	0.296736	0	3.09594	0	0	0	0	Ugni molinae	1	46	16	13	81.25	30	0	0
195	Undisturbed	Lycalopex griseus	7	256.517	2	82.5141	0	0.286816	0	3.06597	0	0	0	0	Ugni molinae	1	210	24	23	95.8333	30	0	0
196	Undisturbed	Lycalopex griseus	7	246.238	2	82.7958	0	0.257222	0	3.02731	0	0	0	0	Ugni molinae	1	71	15	13	86.6667	30	0	0
196	Undisturbed	Lycalopex griseus	7	246.238	2	82.7958	0	0.257222	0	3.02731	0	0	0	0	Gaultheria mucronata	1	50	20	14	70	30	0	0
197	Undisturbed	Lycalopex griseus	6	228.435	2	82.7726	0	0.227588	0	2.89927	0	0	0	0	Gaultheria mucronata	1	40	10	9	90	30	0	0
197	Undisturbed	Lycalopex griseus	6	228.435	2	82.7726	0	0.227588	0	2.89927	0	0	0	0	Ugni molinae	1	40	5	3	60	14	0	0
198	Undisturbed	Lycalopex culpaeus	2	968.384	4	95.0416	0	0	0	0	0	3.0285	1.92993	0	Aristotelia chilensis	1	60	15	0	0	0	0	0
198	Undisturbed	Lycalopex culpaeus	2	968.384	4	95.0416	0	0	0	0	0	3.0285	1.92993	0	Gaultheria mucronata	1	54	24	21	87.5	30	0	0
199	Undisturbed	Lycalopex sp	2	968.384	4	95.0416	0	0	0	0	0	3.0285	1.92993	0	Aristotelia chilensis	1	7	2	0	0	0	0	0
199	Undisturbed	Lycalopex sp	2	968.384	4	95.0416	0	0	0	0	0	3.0285	1.92993	0	Gaultheria mucronata	1	124	26	26	100	30	0	0
199	Undisturbed	Lycalopex sp	2	968.384	4	95.0416	0	0	0	0	0	3.0285	1.92993	0	Prunus spp.	1	6	2	2	100	4	0	0
201	Undisturbed	Lycalopex griseus	1	684.905	2	97.714	0	0	0	0	0	0.484908	0	0	Malus sylvestris	1	4	1	1	100	3	2	66.6667
201	Undisturbed	Lycalopex griseus	1	684.905	2	97.714	0	0	0	0	0	0.484908	0	0	Ugni molinae	1	3	1	0	0	0	0	0
202	Undisturbed	Lycalopex sp	3	720.117	2	96.5971	0	0	0	0	0	0.435256	0	0	Ugni molinae	1	5	2	2	100	3	0	0
204	Undisturbed	Lycalopex griseus	3	1562.58	0	96.1706	0.860875	0.148427	0	0.286958	0.336434	0.48486	0	1.71185	Ugni molinae	1	16	5	3	60	10	0	0
205	Undisturbed	Lycalopex sp	3	1562.58	0	96.1706	0.860875	0.148427	0	0.286958	0.336434	0.48486	0	1.71185	Gaultheria mucronata	1	64	18	13	72.2222	30	0	0
206	Undisturbed	Lycalopex griseus	1	3619.42	0	95.1034	0.148383	0.0197844	0	1.30577	0	0	0	3.42269	Ugni molinae	1	74	16	14	87.5	30	0	0
207	Disturbed	Lycalopex griseus	32	421.439	19	72.2057	6.95351	0.148368	1.41444	3.9367	1.62216	7.87339	0	5.8457	Ugni molinae	1	803	23	22	95.6522	30	30	100
208	Disturbed	Lycalopex griseus	7	3137.17	0	81.8281	0	10.8715	0	6.21229	0	0	0	0.207736	Prunus spp.	1	35	10	6	60	25	16	64
208	Disturbed	Lycalopex griseus	7	3137.17	0	81.8281	0	10.8715	0	6.21229	0	0	0	0.207736	Rubus ulmifolius	1	153	23	16	69.5652	30	4	13.3333
209	Disturbed	Lycalopex griseus	21	233.296	3	84.7409	2.68987	0.445016	0.059335	5.13252	0.009889	2.43275	0	4.48972	Gaultheria mucronata	1	50	20	16	80	30	0	0
209	Disturbed	Lycalopex griseus	21	233.296	3	84.7409	2.68987	0.445016	0.059335	5.13252	0.009889	2.43275	0	4.48972	Rubus ulmifolius	1	147	25	22	88	30	2	6.66667
211	Disturbed	Lycalopex griseus	24	3294.51	0	82.0259	0	10.3472	0	6.21229	0	0	0	0.207736	Prunus spp.	1	1	1	1	100	1	1	100
211	Disturbed	Lycalopex griseus	24	3294.51	0	82.0259	0	10.3472	0	6.21229	0	0	0	0.207736	Ugni molinae	1	52	22	22	100	30	0	0
212	Undisturbed	Lycalopex griseus	4	90.452	2	89.3998	0	0.613072	0	2.48195	0	0	0	0	Gaultheria mucronata	1	53	20	18	90	30	0	0
212	Undisturbed	Lycalopex griseus	4	90.452	2	89.3998	0	0.613072	0	2.48195	0	0	0	0	Ugni molinae	1	1330	20	20	100	27	0	0
213	Undisturbed	Lycalopex griseus	5	211.254	2	84.2053	0	0.207695	0	2.93739	0	0	0	0	Gaultheria mucronata	1	49	19	19	100	30	0	0
215	Undisturbed	Lycalopex sp	7	397.305	2	77.5591	0	0.375828	0	3.51103	0	0	0	0	Gaultheria mucronata	1	1563	60	55	91.6667	90	0	0
216	Undisturbed	Lycalopex griseus	10	664.676	2	66.9371	0	0.524337	0	3.94737	0	0	0	0.029679	Gaultheria mucronata	1	102	37	36	97.2973	60	0	0
216	Undisturbed	Lycalopex griseus	10	664.676	2	66.9371	0	0.524337	0	3.94737	0	0	0	0.029679	Ugni molinae	1	292	29	29	100	60	0	0
217	Undisturbed	Lycalopex griseus	11	1062.74	2	50.3957	0	0.870425	0	3.76855	0	0	0	0.178042	Ugni molinae	1	11	5	4	80	6	0	0
219	Undisturbed	Lycalopex culpaeus	1	119.517	4	96.943	0	0	0	0	0	0.811239	1.68184	0.56391	Rubus ulmifolius	1	60	30	22	73.3333	30	5	16.6667
220	Undisturbed	Lycalopex griseus	1	3729.5	0	94.9352	0.148383	0.0197844	0	1.31566	0	0	0	3.58097	Gaultheria mucronata	1	545	30	30	100	30	30	100
220	Undisturbed	Lycalopex griseus	1	3729.5	0	94.9352	0.148383	0.0197844	0	1.31566	0	0	0	3.58097	Ugni molinae	1	28	13	13	100	15	15	100
222	Undisturbed	Lycalopex griseus	1	3267.56	0	96.0447	0.148324	0.0197765	0	1.22615	0	0	0	2.56106	Gaultheria mucronata	1	65	30	27	90	30	0	0
222	Undisturbed	Lycalopex griseus	1	3267.56	0	96.0447	0.148324	0.0197765	0	1.22615	0	0	0	2.56106	Ugni molinae	1	8	4	4	100	4	0	0
223	Disturbed	Lycalopex griseus	31	404.276	19	72.0475	7.00297	0.148368	1.42433	3.90702	1.62216	7.93274	0	5.91494	Ugni molinae	1	568	28	28	100	30	30	100
224	Disturbed	Lycalopex griseus	31	15.6652	23	69.0405	7.66568	0.148368	1.50346	3.19486	1.62216	10.3956	0	6.42928	Ugni molinae	1	676	26	26	100	30	30	100
225	Disturbed	Lycalopex griseus	35	78.452	24	68.9219	7.79426	0.138477	1.30564	2.82888	2.04748	10.7122	0	6.25124	Ugni molinae	1	195	28	26	92.8571	30	30	100
226	Disturbed	Lycalopex griseus	10	3313.57	0	81.5547	0	10.5133	0	6.45831	0	0	0	0.207695	Ugni molinae	1	56	26	26	100	30	30	100
227	Undisturbed	Lycalopex sp	11	397.657	57	51.276	6.00396	0	0	0	0.524233	0.563798	3.24431	0.306627	Gaultheria mucronata	1	595	28	4	14.2857	30	0	0
228	Undisturbed	Lycalopex sp	5	55.5496	2	88.1998	0	0.405539	0	2.7003	0	0	0	0	Gaultheria mucronata	1	508	30	8	26.6667	30	0	0
229	Undisturbed	Lycalopex sp	10	863.499	2	58.4768	0	0.74184	0	3.79822	0	0	0	0.108803	Gaultheria mucronata	1	91	29	10	34.4828	30	0	0
230	Undisturbed	Lycalopex sp	17	1707.93	0	71.7127	0	3.04739	0	24.3495	0	0	0	0.890472	Gaultheria mucronata	1	55	18	10	55.5556	30	0	0
231	Undisturbed	Lycalopex griseus	12	1454.42	1	56.8193	0.128573	0	0	24.2706	0	6.3693	0	12.1353	Ugni molinae	1	373	31	31	100	30	30	100
232	Undisturbed	Lycalopex griseus	15	1405.26	1	58.7851	0.178077	0	0	24.7428	0	6.0645	0	10.002	Ugni molinae	1	185	28	28	100	30	30	100
